# Supplementary material for: Primary cilia modulate balance of canonical and non-canonical Wnt signaling responses in the injured kidney
Source: PubMed Central journal article supplement (PMC4404279; doi:10.1186/s13069-015-0024-y), 2015-04-16
Supplement: 13069_2015_24_MOESM2_ESM.pdf [file 13069_2015_24_MOESM2_ESM.pdf]

### Oigonucleotides for qRT-PCR

| Target gene | Forward primer sequence<br>Reverse primer sequence  | Supplier         |
|-------------|-----------------------------------------------------|------------------|
| mWnt1       | GCCTCGGAGCCATTGAACA<br>GCAAATTATTTACACAGTGATGAGGA   | Primerdesign, UK |
| mWnt2b      | GGGGATGTTGTACAGATCA<br>CTGCTGCTGCTACTCCTGACT        |                  |
| mWnt3a      | TGCCATGAACCGTCACAAC<br>CCAGCAGGTCTTCACTTCAC         | Primerdesign, UK |
| mWnt4       | CTGGAGAAGTGTGGCTGTGA<br>GGACTGTGAGAAGGCTACGC        |                  |
| mWnt5a      | TTACACAACAATGAAGCAGG<br>ACACTCCATGACACTTACAG        |                  |
| mWnt6       | GGTTCGAGAATGTCAGTTCC<br>ATTGCAAACACGAAAGCTG         |                  |
| mWnt7a      | CTAGCTCTCGGAACTGTGGC<br>TTACACAATAACGAGGCGGG        |                  |
| mWnt7b      | CCAGGCCAGGAATCTTGTT<br>ACGTGTTTCTCTGCTTTGGC         |                  |
| mWnt9b      | CGAGGAGATGCGAGAGTGC<br>GGAAGGGTGTGAGGACCTC          |                  |
| mWnt10a     | AGATCTGATTGACATTCCTCC<br>TGAGCTAGGAACAGAAAGAG       |                  |
| mWnt11      | TGAAGGACTCAGAACTTGTG<br>GGAAGTCTTGTTGCACTG          |                  |
| mAxin2      | ACGATTCCATGTCCATGAC<br>AATGAGGTAGAGACACTTGG         | Primerdesign, UK |
| mWisp2      | CTTCTTGGACTTCTATGTGCTTGT<br>CGGGCAGGGTGTCTCAG       | Primerdesign, UK |
| mTrp53      | GAACCGCCGACCTATCCTTA<br>GCACAAACACGAACCTCAA         | Primerdesign, UK |
| mCnd1       | AACCATTCCATTTCAAAGCACTT<br>ATCCCATCCATTCCATTAGAAC   | Primerdesign, UK |
| hAXIN2      | TGTGGGCAGTAAGAAACAG<br>CTCGGGAAATGAGGTAGAG          | Primerdesign, UK |
| hWISP2      | CGGAACATAAAGACTCACAGGT<br>AGGCAGAGGAGGGAGAAGG       | Primerdesign, UK |
| hTP53       | GTGGAGTATTTGGATGACAGAAAC<br>GTAGTTGTAGTGGATGGTGGTAC | Primerdesign, UK |
| hCCND1      | GACCTTCGTTGCCCTCTGT<br>GCGGTAGTAGGACAGGAAGTT        | Primerdesign, UK |
| mCamk2a     | ACCACTTCCTTCCACCACTT<br>TGAGATACAGCATTCCATAACAAGA   | Primerdesign, UK |
| mPlcb1      | TCAAACCAATCCGATATGTCAAT<br>AGCCTCCTTCTTTACTTCTCTT   | Primerdesign, UK |
| mDaam1      | GGAAGGAGGAGGAGGAACG<br>TCCACTCTCTTCACTGCTCTC        | Primerdesign, UK |
| mPtk7       | AATGCTGGAACCCTACACTTTG<br>CCCTGTGGCTCGTTGGAT        | Primerdesign, UK |
| hCAMK2A     | AGCAAAGCACTGGGAATTTCT<br>AGGGAAAGAGGGAAAGAGGAAA     | Primerdesign, UK |

|        |                                                          |                  |
|--------|----------------------------------------------------------|------------------|
| hPLCB1 | CTCAGCCCCTTTCTCACTATTTTC<br>ACACAGCGACAACCAGACA          | Primerdesign, UK |
| hDAAM1 | GAGAAGGAAGAAGAAGAAGAAGAAG<br>TTTAGAAAGTTGAGGATACATGATAGG | Primerdesign, UK |
| hPTK7  | CGTGGTAGTAGCGAGGTATGA<br>GCGGTTAGTGATGGGAGTCT            | Primerdesign, UK |
| mGapdh | undisclosed                                              | Primerdesign, UK |
| hGAPDH | undisclosed                                              | Primerdesign, UK |
